# Supplementary material
Source: PubMed Central journal article supplement (PMC4190649)
Supplement: mmc2.pdf [file mmc2.pdf]

## Article

# Hv1 Proton Channel Opening Is Preceded by a Voltage-independent Transition

Carlos A. Villalba-Galea<sup>1,\*</sup><sup>1</sup>Department of Physiology and Biophysics, Virginia Commonwealth University School of Medicine, Richmond, Virginia

**ABSTRACT** The voltage sensing domain (VSD) of the voltage-gated proton channel Hv1 mediates a H<sup>+</sup>-selective conductance that is coordinately controlled by the membrane potential ( $V$ ) and the transmembrane pH gradient ( $\Delta\text{pH}$ ). Allosteric control of Hv1 channel opening by  $\Delta\text{pH}$  ( $V$ - $\Delta\text{pH}$  coupling) is manifested by a characteristic shift of approximately 40 mV per  $\Delta\text{pH}$  unit in the activation. To further understand the mechanism for  $V$ - $\Delta\text{pH}$  coupling in Hv1, H<sup>+</sup> current kinetics of activation and deactivation in excised membrane patches were analyzed as a function of the membrane potential and the pH in the intracellular side of the membrane ( $\text{pH}_i$ ). In this study, it is shown for the first time to our knowledge that the opening of Hv1 is preceded by a voltage-independent transition. A similar process has been proposed to constitute the step involving coupling between the voltage-sensing and pore domains in tetrameric voltage-gated channels. However, for Hv1, the VSD functions as both the voltage sensor and the conduction pathway, suggesting that the voltage independent transition is intrinsic to the voltage-sensing domain. Therefore, this article proposes that the underlying mechanism for the activation of Hv1 involves a process similar to VSD relaxation, a process previously described for voltage-gated channels and voltage-controlled enzymes. Finally, deactivation seemingly occurs as a strictly voltage dependent process, implying that the kinetic event leading to opening of the proton conductance are different than those involved in the closing. Thus, from this work it is proposed that Hv1 activity displays hysteresis.

## INTRODUCTION

The proton channel known as Hv1 mediates a voltage-dependent H<sup>+</sup> conductance ( $G_{\text{vH}^+}$ ) that was first measured in molluscan neurons and subsequently shown to be prominently expressed in alveolar epithelial cells and phagocytic leukocytes of the innate immune system (1). A variety of other cells, ranging from mammalian microglia, skeletal muscle, and B-cells to a unicellular dinoflagellate, are known to express Hv1 or  $G_{\text{vH}^+}$  (2–13). Studies in knockout mice demonstrate that Hv1 channels are required for high-level superoxide production and efficient bacterial clearance in granulocytes and neutrophils (10,13,14) and superoxide-dependent B-cell receptor signaling (3). Also, Hv1 contributes to microglial ROS-dependent neuronal damage (15).

A biophysical signature of both native  $G_{\text{vH}^+}$  and expressed Hv1 channels is that its voltage dependence shifts as a function of the difference in pH between the extracellular ( $\text{pH}_o$ ) and intracellular ( $\text{pH}_i$ ) sides of the membrane, also known as the transmembrane pH gradient ( $\Delta\text{pH} = \text{pH}_i - \text{pH}_o$ ) (4,9,11,16–18). In general, the voltage dependence of Hv1 shifts  $\sim 40$  mV per  $\Delta\text{pH}$  unit over a wide range of absolute  $\text{pH}_i$  or  $\text{pH}_o$ , displaying activation of the conductance at potentials above the reversal potential for protons (1,16). For instance, for a  $\Delta\text{pH} = 0$ , Hv1 opens

at positive potential; for intracellular acidification ( $\Delta\text{pH} < 0$ ), as is physiologically the case, Hv1 opens at more negative potentials. Consequently, voltage-gated H<sup>+</sup> channels normally mediate only steady-state proton efflux from cells (1).

Control over the direction of H<sup>+</sup> flow through H<sup>+</sup> channels and concomitant changes in  $\text{pH}_i$  are likely to have important consequences for signaling and metabolic cascades in cells that express Hv1 (1). Therefore, identifying the mechanism by which changes in pH modulate voltage-dependent gating in Hv1 is essential for understanding how H<sup>+</sup> channels contribute to cellular pH homeostasis. In spite of advances in structural and functional insights of proton channels, the mechanism of coupling between  $\Delta\text{pH}$ -sensing and voltage-sensing machineries ( $V$ - $\Delta\text{pH}$  coupling) remains unknown. In the late 1990s, it was postulated that sensitivity to changes in  $\Delta\text{pH}$  results from H<sup>+</sup> binding to a channel-associated site in the membrane electric field (16). However, failure to identify a H<sup>+</sup> regulatory site using mutagenesis strategies has cast doubt on the validity of this postulate (18,19). In addition,  $V$ - $\Delta\text{pH}$  coupling is also unaffected by mutations that impair H<sup>+</sup> selectivity for ion permeation in Hv1 (19). Furthermore, the available data are consistent with the hypothesis that protein-associated water molecules that reside in the putative central crevice within the structure of Hv1 are required for a Grothuss-type H<sup>+</sup> transfer in an aqueous “water-wire” (18). Depending on proton

Submitted May 9, 2014, and accepted for publication August 13, 2014.

\*Correspondence: cavillalbaga@vcu.edu

Editor: William Kobertz

© 2014 by the Biophysical Society  
0006-3495/14/10/1564/9 \$2.00

<http://dx.doi.org/10.1016/j.bpj.2014.08.017>

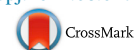

concentration, changes in the structure of the water network associated to the channels may also be transduced into VSD conformational changes altering voltage-dependent gating (18). In addition, these channels form dimers displaying activation that is tuned by cooperativity (20–22). Allosteric modulation in H<sup>+</sup> channels has been shown to be intimately related to a coil-coil interaction between the C terminus of each subunit (21,23). Thus, it is conceivable that changes in ΔpH may induce conformational transitions in the resting state of the channels that, following activation, may result in shifting voltage dependence. Consequently, one possible outcome would be that the activation of Hv1 involves both voltage-dependent and voltage-independent transitions. In this study, kinetic evidence are provided to demonstrate that these two types of transitions operate during the Hv1 activation and deactivation and are likely to determine V-ΔpH coupling in Hv1 channels.

## MATERIAL AND METHODS

### Electrophysiology

Defolliculated *Xenopus laevis* oocytes were injected with in vitro-transcribed cRNA (Life Technology, Carlsbad, CA, Ambion mMessage mMachine) produced from NotI-linearized N-terminal GFP-*Homo sapiens* Hv1 (NM\_032369) (Ramsey et al., 2006 (6); Murata et al., 2005 (24)) in the vector pBSTA. Proton currents were recorded from excised membrane patches in the inside-out configuration using a patch clamp amplifier (model 2400, A-M Systems, Carlsborg, WA) with pipette filled with a pH 6.5-solution (see below) and the indicated pH<sub>i</sub>. Recording solutions contained (in mM): 100 pH buffer (used near its respective pK<sub>a</sub>: pH 4.5 and 5.5, MES; pH 6.5, Bis-Tris; pH 7.5, HEPES), 60 to 80 tetramethylammonium (TMA<sup>+</sup>)-methanesulfonate (MeSO<sub>3</sub><sup>-</sup>), 4 HCl, 2 CaCl<sub>2</sub>, 1 EGTA. pH (at 22°C) was adjusted using TMA-OH (25% w/v) and methanesulfonic acid (>99%) solutions as necessary to achieve a final osmolality of 310 to 320 mOsm; the final TMA<sup>+</sup> and MeSO<sub>3</sub><sup>-</sup> concentrations are therefore slightly different in solutions of various pH. For measurement of Hv1 activation, test pulses ranging from -80 mV to +150 mV were applied for 1200 ms from a holding potential of -60 mV at 0.1 Hz. For deactivation, channels were opened by a 1200 ms pre-pulse to +80 mV from a holding potential of -60 mV and 1000 ms test pulses from +50 mV to -160 mV were applied at 0.1 Hz. Bath was grounded using a Ag/AgCl. There was no leakage currents subtraction.

Electrophysiological data were filtered at 100 kHz, digitized at 250 to 1000 kHz, and oversampled for storage and analysis at 5 to 20 kHz. A custom LabVIEW-based package was used to control a USB-6221 or USB-6251 (National Instruments, Austin, TX) for voltage commanding and current acquisition (C. A. Villalba-Galea, unpublished). Data were analyzed using a custom Java-based software (C. A. Villalba-Galea, unpublished,) and OriginPro9.0 (OriginLab, Northampton, MA).

### Kinetic analysis

Current recordings were fitted to a first-order ordinary differential equation system representing the following four-state sequential model using MatLab.

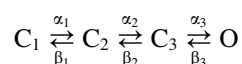

The transition rates of the sequential four-state model were considered to exponentially depend on the membrane potential (see Supporting Material for details). For this type of systems, it can be demonstrated that the general analytical solution has the following form:

$$\vec{S}(t) = \sum_{i=1}^n c_i \vec{\eta}_i e^{\lambda_i t},$$

where  $\vec{S}(t)$  is a vector with elements representing the fraction population of each state;  $n$  is the number of states;  $c_i$  is the  $i$ -th integration constant; and  $\lambda_i$  is the  $i$ -th eigenvector of the matrix with element representing the transitions rate constants (see Supporting Material for details) and  $\vec{\eta}_i$  is its corresponding eigenvalue. To calculate the integration constant  $c_i$ ,  $\vec{S}(t)$  was evaluated at time zero, making the exponential term equal to 1. Thus,

$$\vec{S}(0) = \sum_{i=1}^n c_i \vec{\eta}_i$$

Then, replacing the calculated  $c_i$  in  $\vec{S}(t)$  gives an expression that yields the fractional population of each state as a function of time. Finally, having found  $\vec{S}(t)$  and the fraction of open channels ( $O(t)$ ) that is the last element of the vector  $\vec{S}(t)$ , current can be calculated using the following expression:

$$I(t) = O(t)G_{MAX}(V - V_{H^+}),$$

where  $G_{MAX}$  is the maximum conductance for protons,  $V$  is the membrane potential, and  $V_{H^+}$  is the reversal potential for protons.

Using this model, individual set of recordings were fitted using Simplex (25) as implemented in MatLab. Leak currents were subtracted for the fittings. A built-in Simplex minimization algorithm was set to 50 cycles of 500 iterations (25,000 iterations totals) for each set of currents. The  $\alpha_0$  and  $\beta_0$  parameters were constrained to  $\pm 25\%$  of their running values; and the  $z_\alpha$  and  $z_\beta$  values were constrained to  $\pm 2.5\%$  of their running values. These constrains were updated every cycle. After all the minimizations were finished, the parameters obtained from fitting each data set were averaged and the resulting mean values used as “seed” values for a new round (50 cycles  $\times$  500 iterations) of minimization. This procedure was repeated until the standard deviations of all parameters were smaller than their correspondent mean. For each pH<sub>i</sub>, the number of round of minimization was over 25 sessions, totaling more than 625,000 iterations per data set.

### Exponential fits and weighted average time constant

Activating currents were fitted to a two-exponential function defined as follows:

$$I_{ACT}(t) = I_{MAX} \left( 1 - f_1 e^{-t/\tau_1} - f_2 e^{-t/\tau_2} \right),$$

where  $f_1$  and  $f_2$  are the fraction of the currents in each of the components ( $f_1 + f_2 = 1$ ) and  $\tau_1$  and  $\tau_2$  are the corresponding time constants. For deactivation, the two-exponential function was defined as follows:

$$I_{DEACT}(t) = I_{MAX} \left( f_{FAST} e^{-t/\tau_{FAST}} + f_{SLOW} e^{-t/\tau_{SLOW}} \right)$$

Whereas, for deactivation, the weighted average time constant was calculated using the following equation:

$$\tau_{AVE} = f_{FAST} \tau_{FAST} + f_{SLOW} \tau_{SLOW},$$

where  $\tau_{FAST}$ ,  $\tau_{SLOW}$ ,  $f_{FAST}$ , and  $f_{SLOW}$  are equivalent to  $\tau_1$ ,  $\tau_2$ ,  $f_1$ , and  $f_2$ , respectively.

## Single Boltzmann equation

The curves of open probability ( $P_o$ ) as a function of the membrane potential ( $P_o$ - $V$  curves) were fitted to a single (two-state) Boltzmann equation (26) defined as follows:

$$P_o(V) = \frac{P_{oMAX}}{1 + e^{z(V-V_{1/2})/kT}},$$

where, as before,  $V$  is the membrane potential,  $z$  the apparent sensing charge,  $P_{oMAX}$  is the maximum open probability,  $V_{1/2}$  is the potential of half-maximum activation,  $k$  is the Boltzmann constant, and  $T$  is the absolute temperature.

## RESULTS

### Initial assessment of the Hv1 activation kinetics

Recording of  $H^+$ -currents were performed in 15 to 20  $\mu\text{m}$  inside-out (macro-)patches of the plasma membrane from *Xenopus* oocytes expressing human Hv1. To obtain fast activating  $H^+$ -conductance, currents were recorded in  $\Delta\text{pH} = -2$  ( $\text{pH}_o/\text{pH}_i = 6.5/4.5$ ) at potentials ranging between -80 mV and +80 mV from a holding potential (H.P.) of -60 mV (Fig. 1 A). The recorded currents displayed at least two temporal components. As shown before, a two-exponential function was used to quantify the activation kinetics of the  $H^+$ -conductance (22,27). Plotting the fitted time constants as a function of the membrane potential ( $\tau_{\text{ACT}}-V$  curve) revealed that both components were associated to voltage-dependent transitions because both time constants decreased at higher potentials (Fig. 1 B). To estimate the apparent charge associated with these components, the time constants were assumed to be described by the following expression:

$$\tau_{\text{ACT}} = \tau_{\text{ACT},0} e^{-zV/kT}, \quad (1)$$

where  $\tau_{\text{ACT},0}$  is the time constant in the absence of an electric field (at 0 mV),  $z$  is the apparent charge modulating this rate,  $V$  is the membrane potential,  $k$  is the Boltzmann constant, and  $T$  is the absolute temperature. Fitting the  $\tau_{\text{ACT}}-V$  curve to Eq. 1 showed that both temporal components of the activation were voltage dependent with  $z$  values of  $3 \pm 6$  and  $3 \pm 9$  ( $n = 6$ ; fitted values  $\pm$  fitting error) for the fast and slow component, respectively. This observation seemingly indicated that the activation of Hv1 involved only voltage-dependent transitions. However, the high error in the fits indicates that assuming the existence of only two transitions was insufficient to describe the activation of Hv1. Further, the fit with two-exponentials ignores the sigmoidal onset of the conductance, indicating that additional components are needed to fit the activation of Hv1. Furthermore, using the sum of exponentials to fit the current traces yields parameters (amplitudes and time constants) that cannot always be directly assigned to specific transitions in the activation of these channels. To overcome these problems, it was sought to describe the

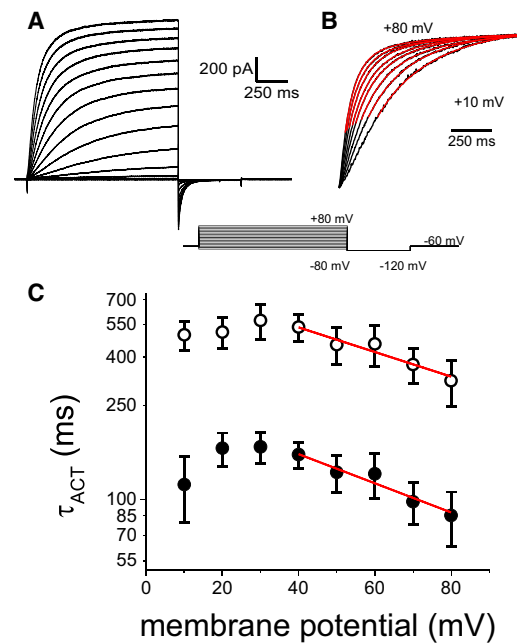

FIGURE 1 Initial characterization of the Hv1 activation kinetics. (A) Inside-out, patch-clamp current recordings of Hv1 expressed in *Xenopus* oocytes. The patches were 15 to 20  $\mu\text{m}$  in diam. and currents were recorded in the presence of a pH gradient ( $\Delta\text{pH}$ ,  $\text{pH}_o/\text{pH}_i$ ) of 6.5/4.5. From a holding potential of -60 mV, currents were evoked with pulses ranging from -80 mV to +80 mV and deactivated at -120 mV. (B) The timing of the currents was estimated by fitting the sum of two exponentials (black versus red traces) to those currents recorded at potentials of +10 mV and above and the lag-phase of traces was ignored. The currents were normalized to the maximum values recorded at each potential for visual comparison. (C) The time constants yielded by the fits were plotted against the membrane potential ( $\tau_{\text{ACT}}-V$  curves) and the resulting plots show that both exponential components display voltage sensitivity. To estimate the apparent gating charge associated with this components, the high-voltage end of the  $\tau_{\text{ACT}}-V$  curves was fitted to Eq. 1. The fits (red lines) show that the apparent gating charges for these components were  $3 \pm 6 e^-$  and  $3 \pm 9 e^-$  (fitted values  $\pm$  fitting error), for the fast and slow components, respectively. To see this figure in color, go online.

activation of Hv1 using a system of first-order linear differential equations that define the sequential four-state model depicted in Fig. 2 A.

### Kinetic characterization of the Hv1 activation using a multistep process

The model shown in Fig. 2 A consists of three sequential transitions connecting four states. As shown in Fig. 1, two exponentials were able to fit the late phase of the proton currents, but were not sufficient to describe the initial lag phase of the activation. To make up for this deficiency, a third component—or transition—was required to fit the activation of the proton conductance. Consequently, a minimal model comprised of four sequential states linked by three voltage-dependent transitions was used to fit the protons currents. For this model, all the transitions were considered to be voltage dependent, with a forward and a backward rate,

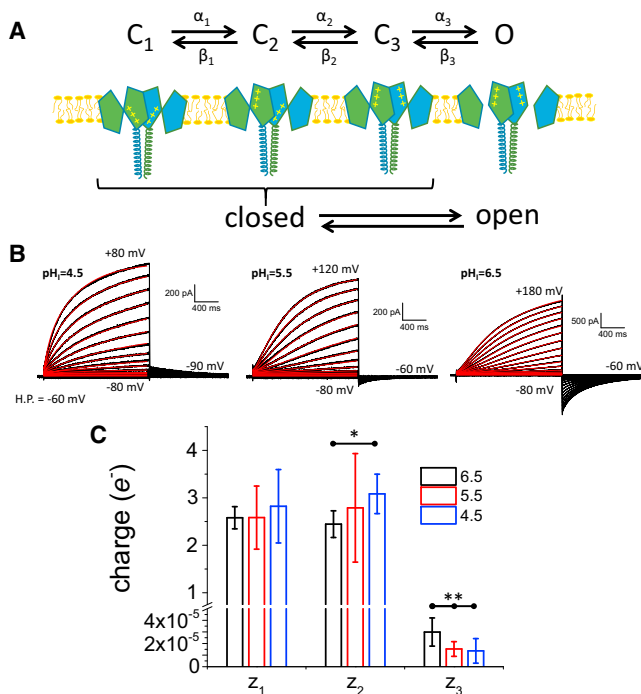

**FIGURE 2** Sensitivity of the electrical component in Hv1 gating to changes in  $\text{pH}_i$ . (A) A four-state sequential model was used to fit the activation kinetics of Hv1, where the first three states of the model are non-conductive (closed, C1-C3), whereas the last one was the conductive state (open, O). All forward ( $\alpha_i$ ) and backward ( $\beta_i$ ) transition rates were considered to be voltage-sensitive (Eqs. 1 and 2). (B) Examples set of proton currents recorded at three different  $\text{pH}_i$ , while keeping  $\text{pH}_o$  at 6.5. All currents (black traces) were recorded from a H.P. of -60 mV, pulsing from -80 mV to +80 mV, +120 mV and +180 mV (left to right), at  $\text{pH}_i$  of 4.5, 5.5, and 6.5, respectively. The four-state model was used to simultaneously fit the activation of the currents evoked at potentials +40 mV and above in each condition (red traces). (C) Average gating charge ( $z_i = z_{\alpha,i} + z_{\beta,i}$ ) associated with each transition were calculated from the values obtained from the fit of individual experiments. The charge associated with the first and second transition ( $z_1$  and  $z_2$ , respectively) average  $\sim 2.5 e^-$ , suggesting that they emerged from the gating of each one of the voltage sensors. These charge values were not statistically different, except for  $z_2$  that was  $3.0 \pm 0.4$  ( $n = 8$ ) at  $\text{pH}_i$  4.5 and  $2.4 \pm 0.3$  ( $n = 5$ ) at  $\text{pH}_i$  6.5 (\*;  $p > 0.05$ ). For the third transition, the values of  $z_3$  were not different ( $p < 0.05$ ) at  $\text{pH}_i$  4.5 ( $1 \times 10^{-5} \pm 1 \times 10^{-5}$ ) and 5.5 ( $1.5 \times 10^{-5} \pm 6 \times 10^{-6}$ ), but there was a statistically significant increase (\*\*;  $p < 0.05$ ) at  $\text{pH}_i$  6.5 ( $2.6 \times 10^{-5} \pm 1.6 \times 10^{-6}$ ). To see this figure in color, go online.

each one defined by two to-be-fitted parameters (see Methods for details). For transitions leading to the open state (forward transitions), the parameters  $\alpha_{0,i}$  and  $z_{\alpha,i}$  corresponded to the transition rate of the  $i$ -th transition in the absence of an electric field and the charge associated with the transition, respectively. Likewise,  $\beta_{0,i}$  and  $z_{\beta,i}$  were corresponding parameters for the transitions leading in the opposite direction (backward transitions). The forward and backward rates were functions of the membrane potential and were defined as follows:

$$\alpha_i(V) = \alpha_{0,i} e^{z_{\alpha,i} V / kT}, \quad (2)$$

$$\beta_i(V) = \beta_{0,i} e^{-z_{\beta,i} V / kT}, \quad (3)$$

where, as before,  $k$  and  $T$  are the Boltzmann constant and the absolute temperature, respectively.

For these fits, it was assumed that both voltage sensors in the dimer must be activated to open the conductive pathway (Fig. 2 A). Thus, consistent with a recent report (28), only the last state (O) will be conductive. Also, the total gating charge was constrained between 5 and 6  $e^-$  as per recent determination of minimum gating charge by “limiting slope” measurements (22).

From a H.P. of -60 mV, proton currents were evoked by pulses from -80 mV to +80 mV and typical activation of Hv1 mediated currents were observed. Then, those currents recorded above -50 mV were taken for fitting to the four-state model (Fig. S1 A in the Supporting Material). All the traces were simultaneously fitted to the model, thus the calculated traces (Fig. S1 A, red traces) reflect the best global reproduction of the data that the model can produce. As expected, the activation of the proton current was voltage dependent. Consistent with the two-exponential fits shown above, the total charge associated with the first and second transition,  $z_1 = z_{\alpha,1} + z_{\beta,1}$  and  $z_2 = z_{\alpha,2} + z_{\beta,2}$ , respectively, in the particular instance shown in Supporting Material. Fig. 1 B were  $2.4 e^-$  and  $2.8 e^-$ , respectively. This observation indicated that these transitions were sensitive to membrane potential changes. However, the present analysis also revealed that the charge associated with the last transition ( $z_3 = z_{\alpha,3} + z_{\beta,3}$ ) was  $2 \times 10^{-5} e^-$ , implying that the transition leading to the opening of the proton conductance was practically voltage-independent. Therefore, it seemed that the transition preceding the opening of the conductance is rate limiting for the activation of Hv1.

To further explore the voltage-dependence of Hv1 activation, it was sought to determine how  $\Delta\text{pH}$  modulates activation in terms of the four-state model. To do this, the kinetic analysis was extended to proton currents recorded at other  $\text{pH}_i$  values, while keeping  $\text{pH}_o$  at 6.5. From a H.P. of -60 mV, currents were recorded at potentials ranging from -80 mV to +80, +120 mV and +180 mV for  $\text{pH}_i$  of 4.5, 5.5, and 6.5, respectively. Individual sets of currents were fitted to the four-state model (fitted values in Table S1). From these fits, it was observed that the average gating charge associated with the first and second transitions were not statistically different at any pH ( $n = 6$  to 8;  $p > 0.05$ ), except for the charge for the second transition at  $\text{pH}_i$  6.5 with respect to  $\text{pH}_i$  4.5 (Fig. 2 C). Likewise, the average charge associated with the last transition was in the order of  $2 \times 10^{-5}$  at all the  $\text{pH}_i$  tested (Fig. 2 C). This observation indicated that the third transition was practically insensitive to membrane potential changes.

From the fits, it was found that all of the rate coefficients were sensitive to changes in  $\text{pH}_i$  (Fig. 3). In general, the forward rates decreased as a function of the  $\text{pH}_i$ , whereas the backward rates increased as a function of the  $\text{pH}_i$ . This

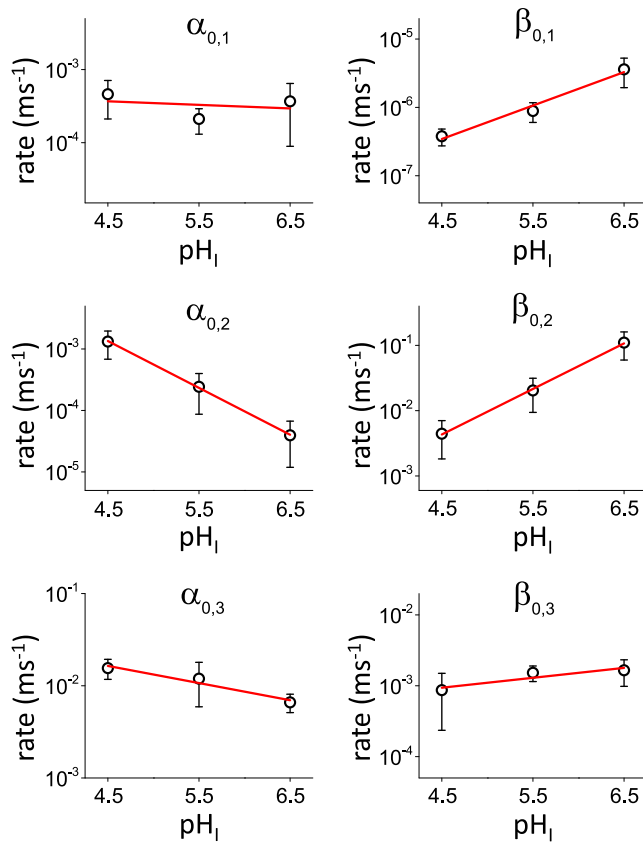

FIGURE 3  $\text{pH}_i$ -dependence of the transition rates at 0 mV. The parameters  $\alpha_0$  and  $\beta_0$  (Eqs. 1 and 2) were obtained from fitting proton currents to the four-state model. These coefficients are the rate constant of the reaction in the absence of any electrical field, thus they correspond to the chemical component of the reaction. All coefficient were sensitive to  $\text{pH}_i$ , where the forward rates increased as the intracellular side was acidified, whereas the backward rate increased when the intracellular side was alkalized. The red lines correspond to the fit of the logarithm of the rates as a function of  $\text{pH}_i$ . The slope of this traces constitute a measure of  $\text{pH}_i$ -dependence of these rate coefficients, so that increasing the steepness of the slope indicates higher  $\text{pH}_i$  sensitivity (see Fig. 5). To see this figure in color, go online.

observation suggested that the kinetic analysis shown in this study produced parameters that were able to reproduce the voltage-dependent activity of Hv1. To show this further, curves of open probability ( $P_o$ ) as a function of the membrane potential ( $P_o$ -V curves) were generated and, as expected, found that voltage-dependence shifted toward positive potentials as the  $\text{pH}_i$  increased (Fig. 4 A, open symbols). For simplicity, the  $P_o$ -V curves were fitted to a single Boltzmann equation (Fig. 4 A, lines). The values for the half-maximum activation,  $V_{1/2}$ , were plotted against  $\text{pH}_i$  (Fig. 4 B). A linear regression of the plots revealed that the voltage dependence shifted  $\sim 39$  mV per unit of  $\text{pH}_i$ , indicating that the parameters obtained from the kinetic analysis shown here could also reproduce steady-state features of the activity of Hv1. Similar to what was reported for  $\text{H}^+$ -currents in eosinophils (29), decreasing  $\text{pH}_i$  seems

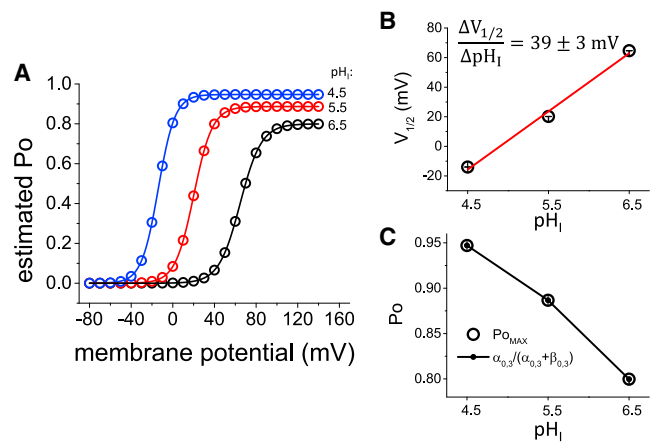

FIGURE 4 Predicted open probability for Hv1. (A) The open probability ( $P_o$ ) of Hv1 was estimated as a function of the potential ( $P_o$ -V curve) and  $\text{pH}_i$  using both the rate coefficient at 0 mV and the sensing charge values obtained from the fits. The calculated  $P_o$ -V curves were fitted to a single Boltzmann equation (lines). (B) From the fit to the Boltzmann equations, the half-maximum potential ( $V_{1/2}$ ) shifted to more negative potentials as  $\text{pH}_i$  was lower. Linear regression of the  $V_{1/2}$ -vs- $\text{pH}_i$  plot showed a shift of  $\sim 39$  mV per unit of  $\text{pH}_i$  in the value of  $V_{1/2}$ . (C) The  $P_o$ -V curves also predicted a decrease in the maximum  $P_o$  ( $P_{o,\text{MAX}}$ ) for Hv1.  $P_{o,\text{MAX}}$  seems to be determined by the last transition as the fitted  $P_{o,\text{MAX}}$  and the one calculated from the rates coincide in the graph. To see this figure in color, go online.

to increase the  $P_{o,\text{MAX}}$ . It cannot be ruled out that is the change in the gradient, rather than the absolute value of  $\text{pH}_i$ , is what modulates  $P_{o,\text{MAX}}$ . Nevertheless, as shown in Figure Fig. 4 C, the  $P_{o,\text{MAX}}$  values calculated from the fits to the Boltzmann equation increases from 0.80 to 0.95 when  $\text{pH}_i$  changes from 6.5 to 4.5. Further, this increased activity of the channels seems to be determined by the last transition. Because the first and second transitions have voltage-dependent transition rates, their backward rates tend to go to zero at positive potentials, whereas their forward rates become very large. In contrast, the rates for the last transition remain virtually unchanged. Following this idea,  $P_{o,\text{MAX}}$  was approximated using the following equation:

$$P_{o,\text{MAX}} = \frac{\alpha_{0,3}}{\alpha_{0,3} + \beta_{0,3}} \quad (4)$$

As shown in Fig. 4 C, the values of  $P_{o,\text{MAX}}$  calculated from the rate constants coincided with the values obtained from the fits to the Boltzmann equation. This observation suggested that the last transition has an important contribution to the pH sensitivity of the activity of Hv1.

### All transitions display $\text{pH}_i$ dependency

Next, the  $\text{pH}_i$  dependence of the remaining transitions was determined using the plots of the average  $\alpha_{0,i}$  and  $\beta_{0,i}$  with respect to  $\text{pH}_i$  (Fig. 3) to quantitatively assess  $\text{pH}_i$  sensitivity. To do this, the quantities  $p\alpha_{0,i}$  and  $p\beta_{0,i}$  were defined as the logarithm of the rate constant of the  $i$ -th transition at

0 mV and a linear regression was calculated with respect to  $pH_I$  (Fig. 3, red traces). Using the slope of the fitted linear equation as a measure of  $pH_I$  sensitivity,  $\Delta p\alpha_{0,i}/\Delta pH_I$  and  $\Delta p\beta_{0,i}/\Delta pH_I$  for the forward and backward transitions, respectively, it was found that the second transition rates displayed the highest  $pH_I$  sensitivity, reaching almost an order of magnitude change per unit of  $pH_I$  (Fig. 5). In the case of the first transition, the forward rate seemed to be  $pH_I$ -independent. Yet, the backward transition rate displayed over a half-order magnitude change when comparing  $pH_I$  4.5 with 6.5 (Fig. 5). Finally, the last transition rates displayed a modest  $pH_I$ -dependence changing lesser than 0.2 logarithmic units per unit of  $pH_I$  (Fig. 5). These combined observations indicated that the intermediate steps in the activation of Hv1 are those displaying higher sensitivity to  $pH_I$ .

### Closing of Hv1 does not show a discernible voltage-independent transition

Thus far, it has been shown that all transitions leading to the opening of the proton conductance are sensitive to  $pH_I$  and that the last transition is voltage-independent. Next, the voltage-sensitivity of the closing was kinetically quantified from the deactivation kinetics of Hv1 as a function of membrane potential. To do this, proton currents were activated with a pulse to a fixed positive potential followed by deactivation of the current with a second pulse to voltages ranging from -150 mV to -40 mV. For instance, as illustrated on Fig. 6 A, for  $pH_I$  6.5, a depolarizing 1500 ms-pulse to +80 mV was applied to activate Hv1 to later deactivate the current with a 1200 ms-pulse to negative potentials. The deactivating currents were then fitted to a two exponential function to quantify the time course of this process. In contrast to activation, the deactivation of the proton current was well-fitted by this function (Fig. 6 B) and, therefore, this

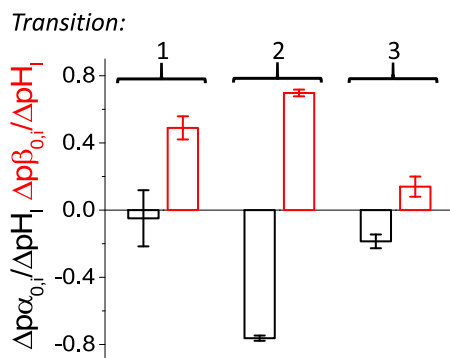

FIGURE 5 Rate coefficient  $pH_I$ -dependence. To access  $pH_I$ -dependence of the rate coefficients, a linear regression (Fig. 4, red lines) of the log10 of  $\alpha_{0,i}$  and  $\beta_{0,i}$  values ( $p\alpha_{0,i}$  and  $p\beta_{0,i}$ , respectively) as a function of the  $pH_I$  was calculated and the slope of the regression ( $\Delta p\alpha_{0,i}/\Delta pH_I$  and  $\Delta p\beta_{0,i}/\Delta pH_I$ , respectively) were taken as indices of  $pH_I$ -sensitivity. In this figure the average values for slope are plotted for each forward and backward transition. All values were statistically different ( $p < 0.05$ ). To see this figure in color, go online.

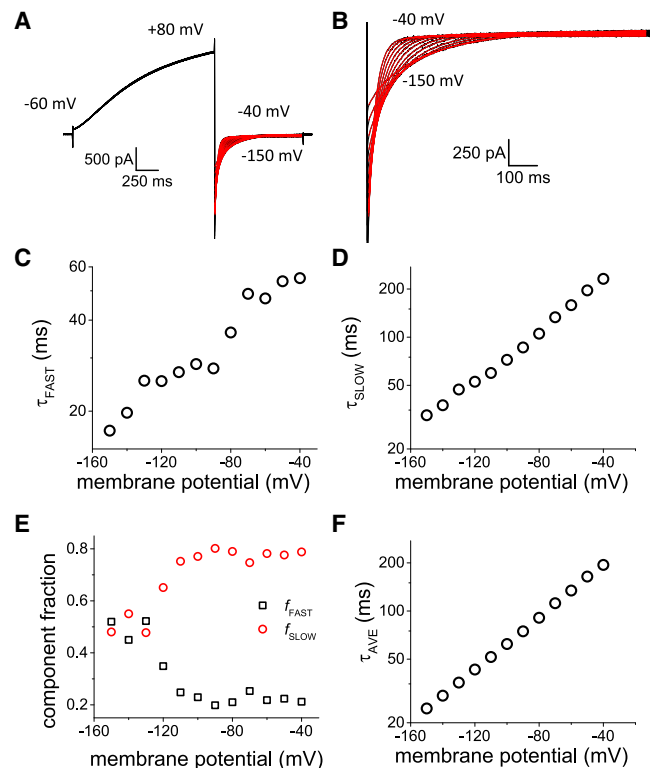

FIGURE 6 Proton current deactivation kinetics. (A) Proton currents (black traces) were evoked with a 1500 ms-pulse to +80 mV and deactivated at potentials ranging from -150 mV to -40 mV. (B) The entire time course of the deactivating currents (black traces) were well-fitted by a two-exponential function (red traces). (C,D) The time constants of the two temporal components observed during deactivation were plotted against the membrane potential ( $\tau_{DEACT-V}$  curves). Both components showed shorter time constant as the membrane potential was more negative. (E) The relative amplitude of the “slow” component dominated the deactivation kinetics. However, the fast components equalized its contribution at more negative potentials. (D) The overall deactivation kinetics were voltage dependent as shown by the plot of the weighted average time constants ( $\tau_{AVE}$ ) with respect to membrane potential. To see this figure in color, go online.

analytical approach was considered sufficient to kinetically characterize the deactivation of the currents. As shown in Figs. 6 C and D, plotting the both time constants as a function of the membrane potential during deactivation ( $\tau_{DEACT-V}$  plot) showed that both, the fast and slow, components were voltage dependent, such that the deactivation became faster as the membrane potential was more negative.

To quantify the voltage-dependence of deactivation of Hv1, the  $\tau_{DEACT-V}$  plots were fitted to the following equation:

$$\tau_{DEACT} = \tau_{DEACT,0} e^{zV/kT}, \quad (5)$$

where, analogously to Eq. 1,  $\tau_{DEACT,0}$  is the time constant in the absence of an electric field (at 0 mV);  $z$  is the apparent sensing charge. As before, the  $z$  values will be an indication of the voltage-dependency of the process. Fitting Eq. 5 to

the more negative range of potential (Fig. 7, red line), revealed that the gating charge associated with both components of the proton conductance closing (Fig. 8) were, at least, one order of magnitude smaller than the total charge associated with the opening, and four orders of magnitude higher than the charge associated with the last activating transition. These observations strongly suggest that the closing of the proton conductance involves transitions that are not observed during activation. In other words, the pathways of activation may differ from the deactivation pathway.

## DISCUSSION

Exponential and powered-exponential functions have been used to characterize the time-course and pH dependence of native proton conductance (22,27,30). More recently, multistate kinetic analysis has been used to describe the activity of channels in an attempt to gain insightful information about the mechanism governing their activity. For instance, in the case of the proton channels isolated from *Ciona intestinalis* (Ci-Hv1), a three-state model was sufficient to describe the activation kinetics of the conductance (31). Using a similar approach in this study, discrete gating steps have been identified in the activation kinetics of Hv1 and characterized their sensitivity to membrane potential and  $\text{pH}_i$ . In this case, a four-state model was found to be sufficient to describe the activation kinetics of the human Hv1

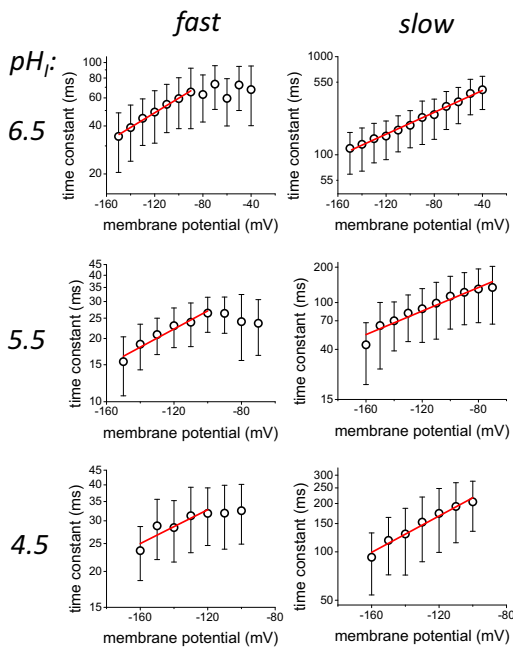

FIGURE 7 Voltage-dependence of the proton current deactivation. The mean time constant for deactivation ( $\tau_{\text{DEACT}}$ ) for both, fast and slow, components were plotted against potential ( $\tau_{\text{DEACT}}$ -V curve). Both components (left and right) were unambiguously voltage sensitive at the three  $\text{pH}_i$  conditions evaluated here (top to bottom) ( $n = 3$  to 6). Voltage sensitivity was determined by fitting to Eq. 5 (red trace). To see this figure in color, go online.

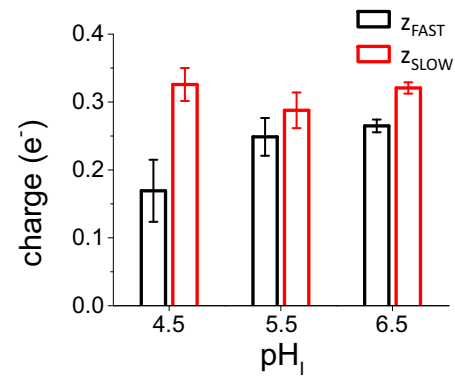

FIGURE 8 Apparent gating charge associated to closing. From the fit of the  $\tau_{\text{DEACT}}$ -V curves, each component seemed to have between 0.15 and 0.35 gating charges driving these transitions, indicating that deactivation was a voltage-dependent process. To see this figure in color, go online.

expressed in *Xenopus* oocytes. The analysis presented in this article has provided important insights into the mechanism of Hv1 gating that are consistent with previous reports using exponential fits of the  $\text{H}^+$  current activation (1,16,32,33). Particularly, the findings show that 1), Hv1 activation gating proceeds in distinct steps, at least one of which is voltage-independent, whereas the channel closing rate is voltage-dependent; 2),  $\text{pH}_i$  differentially affects each of the steps in the Hv1 activation pathway; 3), the  $V$ - $\Delta\text{pH}$  relation in Hv1 is a composite response that requires contributions from both electrical and nonelectrical (i.e., voltage-independent) transitions.

The present analysis also indicates that the activation of Hv1 requires the total movement of  $5.4 \pm 0.9$  ( $n = 18$ ) net gating charges for activation, which is similar to what has been reported for the Ci-Hv1 using “limiting-slope” measurements (31). These observations suggest that, as for tetrameric voltage-gated channels (tVGC), the activation of the conductance occurs after a large fraction of the total gating charge has been mobilized. In Hv1, a similar situation seems to be at play, where sensing charges move leading to the opening of the conductance. Here, however, it was observed that a voltage-independent step is directly linked to the open state, suggesting that the electrically sensitive components of the activation lead the channels to an activated, but not conductive conformation.

In the case of deactivation, the present work shows that this process is voltage dependent, involving nearly  $0.5e^-$  net charges. This seems to be inconsistent with the sequential model used for activation, in which the last transition to the open state is essentially voltage independent. Thus, it is hereby proposed that the return to the resting states occurs through a different pathway than the one leading to the open state (Fig. 9). A direct implication to this idea is that Hv1 may display hysteresis. Specifically, by imposing an activating potential, the VSDs of Hv1 go through voltage-driven conformational changes from the resting (Fig. 9, “ $C_1$ ”) to the activated state (Fig. 9, “ $C_3$ ”). At this point,

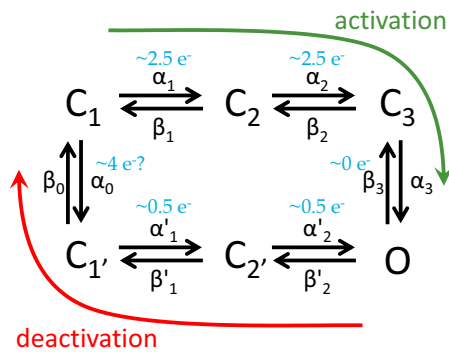

FIGURE 9 Proposed scheme for activation and deactivation of Hv1. The activation pathway involves four sequential states,  $C_1$  to  $C_3$  and  $O$ , whereas the deactivation goes from states  $C_2'$  to  $C_1'$ . The return to the resting state,  $C_1$ , is mediated by a hypothetical step driven by four gating charge. However, it is possible that this transition occurs in several steps. To see this figure in color, go online.

the protein has gained energy from the work done by the electrical field on the gating charges and this energy drives a new transition that leads the channel to the open state (Fig. 9, “ $O$ ”). While the channel opens, a fraction of the energy gained during the gating charge movement is transformed and is not “stored” in the VSD any longer.

This type of behavior has been seen in tVGC (34–40) and voltage-sensitive phosphatases (VSP) (41–43), in which prolonged imposition of an activating potential leads the VSD, through a voltage-independent transition, into a new state known as the “relaxed” state (36). In tVGC and VSP, VSD relaxation occurs after prolonged activation of the VSD (36,43,44). In the case of Hv1, the analysis shown here suggests that the open state is equivalent to the “relaxed” state observed in tVGC and VSPs. Testing this idea would imply recording gating currents or taking any other approach that can reliably report conformational changes in the VSD that are strictly related to activation. To the author’s knowledge however, attempts from many research labs, including this, to record gating currents from Hv1 have failed. Therefore, direct proof of this idea remains to be provided.

Regarding the fitting procedure implemented for this project and in light of the elegant work recently published by Hines, Middendorf, and Aldrich (45), it is important to make some considerations on the uniqueness of the fitted parameters reported in this article. In general, when fitting individual sets of experimental data to a given model, a parameter-searching algorithm would render parameters for each set of data. Ideally, these sets of parameters would be very similar to each other. However, it is also possible that these sets of parameters may display a large variability. This variability may be due to noise in the measurement and also to heterogeneities in the data emerging from the intrinsic fluctuations of the system under study. Variability in the fitted parameters may arise from technical issues such as how the searching algorithm is initialized, constrained or tuned. Nevertheless, regardless of the nature of

the variability, the important point to be highlighted is that fitting the same type of data to a given model may yield multiple distinct solutions. This idea is also applicable to the present work. Thus, the question to be asked is which the “actual” solution is. To address this issue is important to focus on the nature of the problem at hand. Arguably, a fundamental difference between the examples provided by Aldrich and colleagues and those in this work is that the sets of data fitted here involved multiple conditions as the recordings within a single set were performed at multiple membrane potentials. Thus, for a single set of currents, the same set of parameters ( $\alpha_{0,i}$ ,  $\beta_{0,i}$ ,  $z_{\alpha,i}$  and  $z_{\beta,i}$ ) was simultaneously fitted, so not only the timing of the currents, but also the voltage dependences of the rates were evaluated. As Aldrich and colleagues point out, one way to increase reliability of the fitted parameters is by collecting other types of data using existing approaches. The approach taken for this work seems to comply with this requirement since the data provided not only information as a function of the time, but also as a function of voltage.

Finally, the data reported in this study raise intriguing questions about the pH sensitivity of VSD-containing proteins. In Hv1, a network of water molecules in the crevice of the VSD that is hypothesized to mediate Grotthuss  $H^+$  transfer may also be required for  $\Delta pH$  sensing (18). An intriguing possibility is that proton occupancy of a centrally located water network within the VSD crevice catalyzes hydrogen bond reorganization and thereby influences the voltage-independent conformational transition that the presented finding is rate-limiting for channel opening when  $pH_i \leq pH_o$ . However the precise molecular mechanisms underlying pH-dependent and voltage-independent transitions in distinct VSD proteins remains unknown and merits further investigation.

## SUPPORTING MATERIAL

Full description of the numerical method used, two figures and one table are available at [http://www.biophysj.org/biophysj/supplemental/S0006-3495\(14\)00888-1](http://www.biophysj.org/biophysj/supplemental/S0006-3495(14)00888-1).

The author would like to thank Dr. I. Scott Ramsey for his invaluable support to this project that made this work possible. The author also thanks Heikki Vaananen and Sofia Gruszecki for their technical assistance during the preparation of *Xenopus* oocytes. Special thanks go to Drs. Louis De Felice and Diomedes Logothetis for helpful discussions and feedback on the manuscript. Also, the author thanks Mr. Christopher Waite for helping to optimize the MatLab routines.

The work was supported by CTSA - KL2TR000057.

## REFERENCES

- Decoursey, T. E. 2003. Voltage-gated proton channels and other proton transfer pathways. *Physiol. Rev.* 83:475–579.
- Bernheim, L., R. M. Krause, ..., C. R. Bader. 1993. A voltage-dependent proton current in cultured human skeletal muscle myotubes. *J. Physiol.* 470:313–333.



3. Capasso, M., M. K. Bhamrah, ..., M. J. Dyer. 2010. HVCN1 modulates BCR signal strength via regulation of BCR-dependent generation of reactive oxygen species. *Nat. Immunol.* 11:265–272.
4. DeCoursey, T. E. 2008. Voltage-gated proton channels. *Cell. Mol. Life Sci.* 65:2554–2573.
5. Eder, C., and T. E. DeCoursey. 2001. Voltage-gated proton channels in microglia. *Prog. Neurobiol.* 64:277–305.
6. Iovannisci, D., B. Illek, and H. Fischer. 2010. Function of the HVCN1 proton channel in airway epithelia and a naturally occurring mutation, M91T. *J. Gen. Physiol.* 136:35–46.
7. Okochi, Y., M. Sasaki, ..., Y. Okamura. 2009. Voltage-gated proton channel is expressed on phagosomes. *Biochem. Biophys. Res. Commun.* 382:274–279.
8. Petheo, G. L., A. Orient, ..., M. Geiszt. 2010. Molecular and functional characterization of Hv1 proton channel in human granulocytes. *PLoS ONE.* 5:e14081.
9. Ramsey, I. S., M. M. Moran, ..., D. E. Clapham. 2006. A voltage-gated proton-selective channel lacking the pore domain. *Nature.* 440:1213–1216.
10. Ramsey, I. S., E. Ruchti, ..., D. E. Clapham. 2009. Hv1 proton channels are required for high-level NADPH oxidase-dependent superoxide production during the phagocyte respiratory burst. *Proc. Natl. Acad. Sci. USA.* 106:7642–7647.
11. Sasaki, M., M. Takagi, and Y. Okamura. 2006. A voltage sensor-domain protein is a voltage-gated proton channel. *Science.* 312:589–592.
12. Smith, S. M., D. Morgan, ..., T. E. DeCoursey. 2011. Voltage-gated proton channel in a dinoflagellate. *Proc. Natl. Acad. Sci. USA.* 108:18162–18167.
13. El Chemaly, A., Y. Okochi, ..., N. Demaurex. 2010. VSOP/Hv1 proton channels sustain calcium entry, neutrophil migration, and superoxide production by limiting cell depolarization and acidification. *J. Exp. Med.* 207:129–139.
14. El Chemaly, A., P. Nunes, ..., N. Demaurex. 2014. Hv1 proton channels differentially regulate the pH of neutrophil and macrophage phagosomes by sustaining the production of phagosomal ROS that inhibit the delivery of vacuolar ATPases. *J. Leukoc. Biol.* 95:827–839.
15. Wu, L. J., G. Wu, ..., D. E. Clapham. 2012. The voltage-gated proton channel Hv1 enhances brain damage from ischemic stroke. *Nat. Neurosci.* 15:565–573.
16. Cherny, V. V., V. S. Markin, and T. E. DeCoursey. 1995. The voltage-activated hydrogen ion conductance in rat alveolar epithelial cells is determined by the pH gradient. *J. Gen. Physiol.* 105:861–896.
17. Musset, B., V. V. Cherny, ..., T. E. DeCoursey. 2008. Detailed comparison of expressed and native voltage-gated proton channel currents. *J. Physiol.* 586:2477–2486.
18. Ramsey, I. S., Y. Mokrab, ..., D. E. Clapham. 2010. An aqueous H<sup>+</sup> permeation pathway in the voltage-gated proton channel Hv1. *Nat. Struct. Mol. Biol.* 17:869–875.
19. Musset, B., S. M. Smith, ..., T. E. DeCoursey. 2011. Aspartate 112 is the selectivity filter of the human voltage-gated proton channel. *Nature.* 480:273–277.
20. Tombola, F., M. H. Ulbrich, ..., E. Y. Isacoff. 2010. The opening of the two pores of the Hv1 voltage-gated proton channel is tuned by cooperativity. *Nat. Struct. Mol. Biol.* 17:44–50.
21. Koch, H. P., T. Kurokawa, ..., H. P. Larsson. 2008. Multimeric nature of voltage-gated proton channels. *Proc. Natl. Acad. Sci. USA.* 105:9111–9116.
22. Musset, B., S. M. Smith, ..., T. E. DeCoursey. 2010. Zinc inhibition of monomeric and dimeric proton channels suggests cooperative gating. *J. Physiol.* 588:1435–1449.
23. Fujiwara, Y., T. Kurokawa, ..., Y. Okamura. 2012. The cytoplasmic coiled-coil mediates cooperative gating temperature sensitivity in the voltage-gated H(+) channel Hv1. *Nat. Commun.* 3:816.
24. Murata, Y., H. Iwasaki, ..., Y. Okamura. 2005. Phosphoinositide phosphatase activity coupled to an intrinsic voltage sensor. *Nature.* 435:1239–1243.
25. Nelder, J. A., and R. Mead. 1965. A simplex method for function minimization. *Comput. J.* 7:308–313.
26. Bezanilla, F., and C. A. Villalba-Galea. 2013. The gating charge should not be estimated by fitting a two-state model to a Q-V curve. *J. Gen. Physiol.* 142:575–578.
27. Schilling, T., A. Gratopp, ..., C. Eder. 2002. Voltage-activated proton currents in human lymphocytes. *J. Physiol.* 545:93–105.
28. Qiu, F., S. Rebolledo, ..., H. P. Larsson. 2013. Subunit interactions during cooperative opening of voltage-gated proton channels. *Neuron.* 77:288–298.
29. Cherny, V. V., R. Murphy, ..., T. E. DeCoursey. 2003. Properties of single voltage-gated proton channels in human eosinophils estimated by noise analysis and by direct measurement. *J. Gen. Physiol.* 121:615–628.
30. DeCoursey, T. E., and V. V. Cherny. 1995. Voltage-activated proton currents in membrane patches of rat alveolar epithelial cells. *J. Physiol.* 489:299–307.
31. Gonzalez, C., S. Rebolledo, ..., H. P. Larsson. 2013. Molecular mechanism of voltage sensing in voltage-gated proton channels. *J. Gen. Physiol.* 141:275–285.
32. DeCoursey, T. E., and V. V. Cherny. 1993. Potential, pH, and arachidonate gate hydrogen ion currents in human neutrophils. *Biophys. J.* 65:1590–1598.
33. Musset, B., M. Capasso, ..., T. E. DeCoursey. 2010. Identification of Thr29 as a critical phosphorylation site that activates the human proton channel Hvcn1 in leukocytes. *J. Biol. Chem.* 285:5117–5121.
34. Bezanilla, F., R. E. Taylor, and J. M. Fernández. 1982. Distribution and kinetics of membrane dielectric polarization. I. Long-term inactivation of gating currents. *J. Gen. Physiol.* 79:21–40.
35. Bruening-Wright, A., and H. P. Larsson. 2007. Slow conformational changes of the voltage sensor during the mode shift in hyperpolarization-activated cyclic-nucleotide-gated channels. *J. Neurosci.* 27:270–278.
36. Labro, A. J., J. J. Lacroix, ..., F. Bezanilla. 2012. Molecular mechanism for depolarization-induced modulation of Kv channel closure. *J. Gen. Physiol.* 140:481–493.
37. Männikkö, R., S. Pandey, ..., F. Elinder. 2005. Hysteresis in the voltage dependence of HCN channels: conversion between two modes affects pacemaker properties. *J. Gen. Physiol.* 125:305–326.
38. Olcese, R., R. Latorre, ..., E. Stefani. 1997. Correlation between charge movement and ionic current during slow inactivation in Shaker K<sup>+</sup> channels. *J. Gen. Physiol.* 110:579–589.
39. Priest, M. F., J. J. Lacroix, ..., F. Bezanilla. 2013. S3-S4 linker length modulates the relaxed state of a voltage-gated potassium channel. *Biophys. J.* 105:2312–2322.
40. Shirokov, R., G. Ferreira, ..., E. Ríos. 1998. Inactivation of gating currents of L-type calcium channels. Specific role of the alpha 2 delta subunit. *J. Gen. Physiol.* 111:807–823.
41. Akemann, W., A. Lundby, ..., T. Knöpfel. 2009. Effect of voltage sensitive fluorescent proteins on neuronal excitability. *Biophys. J.* 96:3959–3976.
42. Villalba-Galea, C. A., W. Sandtner, ..., F. Bezanilla. 2009. Charge movement of a voltage-sensitive fluorescent protein. *Biophys. J.* 96:L19–L21.
43. Villalba-Galea, C. A., W. Sandtner, ..., F. Bezanilla. 2008. S4-based voltage sensors have three major conformations. *Proc. Natl. Acad. Sci. USA.* 105:17600–17607.
44. Villalba-Galea, C. A. 2012. Voltage-controlled enzymes: the new JanusBifrons. *Front. Pharmacol.* 3:161. <http://dx.doi.org/10.3389/fphar.2012.00161>.
45. Hines, K. E., T. R. Middendorf, and R. W. Aldrich. 2014. Determination of parameter identifiability in nonlinear biophysical models: a Bayesian approach. *J. Gen. Physiol.* 143:401–416.

# **Hv1 Proton Channel Opening Is Preceded by a Voltage-independent Transition**

Carlos A. Villalba-Galea<sup>1,\*</sup>

<sup>1</sup>Department of Physiology and Biophysics, Virginia Commonwealth University School of Medicine, Richmond, Virginia

## SUPPLEMENTARY INFORMATION

### *Kinetic analysis*

Current recordings were fitted to a first-order ordinary differential equation system representing a four-state sequential model (Fig. 2A) using MatLab. The transition rates were considered to exponentially depend on the membrane potential. The forward ( $\alpha$ ) and backward ( $\beta$ ) rates were defined as:

$$\alpha_i = \alpha_{0i} e^{z_{\alpha i} V / kT} \quad (1)$$

$$\beta_i = \beta_{0i} e^{-z_{\beta i} V / kT} \quad (2)$$

where,  $\alpha_{0i}$  and  $\beta_{0i}$  are the rate constants at 0 mV of the  $i$ -th transition;  $z_{\alpha}$  and  $z_{\beta}$  are the charge (valence) associated with the  $i$ -th transition;  $V$  is the membrane potential;  $k$  and  $T$  are the Boltzmann constant and the absolute temperature. In terms of differential equations, a sequential 4-state model (below) can be described as follows:

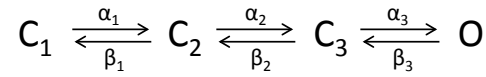

$$\frac{dC_1}{dt} = -\alpha_1 C_1 + \beta_1 C_2$$

$$\frac{dC_2}{dt} = \alpha_1 C_1 - (\beta_1 + \alpha_2) C_2 + \beta_2 C_3$$

$$\frac{dC_3}{dt} = \alpha_2 C_2 - (\beta_2 + \alpha_3) C_3 + \beta_3 O$$

$$\frac{dO}{dt} = \alpha_3 C_3 - \beta_3 O$$

Rearranging these differential equation into matrix form yields

$$\frac{\partial}{\partial t} \begin{pmatrix} C_1 \\ C_2 \\ C_3 \\ 0 \end{pmatrix} = \begin{pmatrix} -\alpha_1 & \beta_1 & 0 & 0 \\ \alpha_1 & -(\beta_1 + \alpha_2) & \beta_2 & 0 \\ 0 & \alpha_2 & -(\beta_2 + \alpha_3) & \beta_3 \\ 0 & 0 & \alpha_3 & -\beta_3 \end{pmatrix} \begin{pmatrix} C_1 \\ C_2 \\ C_3 \\ 0 \end{pmatrix}$$

In general, these kinds of systems can be expressed as

$$\frac{\partial}{\partial t} \vec{S} = \mathbf{A} \vec{S} \quad (3)$$

$$\vec{S} = \begin{pmatrix} C_1 \\ C_2 \\ C_3 \\ 0 \end{pmatrix}; \quad \mathbf{A} = \begin{pmatrix} -\alpha_1 & \beta_1 & 0 & 0 \\ \alpha_1 & -(\beta_1 + \alpha_2) & \beta_2 & 0 \\ 0 & \alpha_2 & -(\beta_2 + \alpha_3) & \beta_3 \\ 0 & 0 & \alpha_3 & -\beta_3 \end{pmatrix}$$

where,  $\vec{S}$  is a column vector (state vector) the elements of which correspond to the population fraction of each state and  $\mathbf{A}$  is the matrix (state matrix) containing the rate constants governing the reaction. The general solution of this system has the form

$$\vec{S}(t) = \vec{\eta} e^{\lambda t} \quad (4)$$

From this proposed solution, the derivative of the state vector is

$$\frac{\partial}{\partial t} \vec{S}(t) = \lambda \vec{\eta} e^{\lambda t} \quad (5)$$

Replacing 4 and 5 in 3 yields

$$\lambda \vec{\eta} e^{\lambda t} = \mathbf{A} \vec{\eta} e^{\lambda t}$$

Rearranging this equation yields

$$\mathbf{A} \vec{\eta} e^{\lambda t} - \lambda \vec{\eta} e^{\lambda t} = \vec{0} \quad \Rightarrow \quad (\mathbf{A} - \lambda \mathbf{I}) \vec{\eta} e^{\lambda t} = \vec{0} \quad (6)$$

where,  $\mathbf{I}$  is an identity matrix of the same dimension than  $\mathbf{A}$ . Because  $e^{\lambda t} > 0$ , equation 7 becomes

$$(\mathbf{A} - \lambda \mathbf{I}) \vec{\eta} = \vec{0} \quad (7)$$

In this latter equation, the scalar  $\lambda$  and the vector  $\vec{\eta}$  are known as the eigenvalue and eigenvector of the matrix  $A$ . In general, there are as many eigenvalue-eigenvectors pairs as elements in the state vector. For this particular case, there are 4 eigenvalues and eigenvectors. Finally, the general solution of this kind of system will be:

$$\vec{S}(t) = \sum_{i=1}^n c_i \vec{\eta}_i e^{\lambda_i t} \quad (8)$$

where,  $n$  is the number of states and  $c_i$  are integration constants. To calculate these latter values, Equation 8 was evaluated at time zero, making the exponential equal to 1. Thus,

$$\vec{S}(0) = \sum_{i=1}^n c_i \vec{\eta}_i \quad (9)$$

At time 0, the values for  $\vec{S}(t)$  correspond to those of the initial condition. Therefore, the values of  $c_i$  can be readily calculated, since Equation 9 is an algebraic system of  $n$  equation with  $n$  unknown ( $c_i$ ). Replacing the calculated  $c_i$  in equation 8 gives an expression that yields by fractional population of each state of the model in time.

Finally, having found  $\vec{S}(t)$  and the fraction of open channels ( $O(t)$ ) which is the last element of the vector  $\vec{S}(t)$ , current can be calculated using the following expression:

$$I(t) = O(t)G_{MAX}(V - V_{H^+})$$

where,  $G_{MAX}$  is the maximum conductance for protons,  $V$  is the membrane potential, and  $V_{H^+}$  is the reversal potential for protons.

**Table S1**

|                | pH <sub>I</sub> 4.5 (n=5) |                      | pH <sub>I</sub> 5.5 (n=5) |                      | pH <sub>I</sub> 6.5 (n=8) |                      |
|----------------|---------------------------|----------------------|---------------------------|----------------------|---------------------------|----------------------|
|                | mean                      | S.D.                 | mean                      | S.D.                 | mean                      | S.D.                 |
| $\alpha_{0,1}$ | $4.5940 \times 10^{-4}$   | $2.9 \times 10^{-4}$ | $2.1092 \times 10^{-4}$   | $8.0 \times 10^{-5}$ | $3.6745 \times 10^{-4}$   | $2.8 \times 10^{-4}$ |
| $\beta_{0,1}$  | $3.7759 \times 10^{-7}$   | $1.0 \times 10^{-7}$ | $8.8539 \times 10^{-7}$   | $2.8 \times 10^{-7}$ | $3.6000 \times 10^{-6}$   | $1.6 \times 10^{-6}$ |
| $z_{\alpha 1}$ | $7.4982 \times 10^{-1}$   | $2.6 \times 10^{-1}$ | $4.8815 \times 10^{-1}$   | $7.3 \times 10^{-2}$ | $1.6265 \times 10^{-1}$   | $7.4 \times 10^{-2}$ |
| $z_{\beta 1}$  | 2.0726                    | $5.1 \times 10^{-1}$ | 2.0954                    | $5.9 \times 10^{-1}$ | 2.4175                    | $1.6 \times 10^{-1}$ |
| $\alpha_{0,2}$ | $1.3196 \times 10^{-3}$   | $6.4 \times 10^{-4}$ | $2.4286 \times 10^{-4}$   | $1.6 \times 10^{-4}$ | $3.943 \times 10^{-5}$    | $2.8 \times 10^{-5}$ |
| $\beta_{0,2}$  | $4.4267 \times 10^{-3}$   | $2.6 \times 10^{-3}$ | $2.0368 \times 10^{-2}$   | $1.1 \times 10^{-2}$ | $1.1001 \times 10^{-1}$   | $5.0 \times 10^{-2}$ |
| $z_{\alpha 2}$ | 1.0120                    | $1.3 \times 10^{-1}$ | $9.8428 \times 10^{-1}$   | $1.5 \times 10^{-1}$ | $9.2826 \times 10^{-1}$   | $8.4 \times 10^{-2}$ |
| $z_{\beta 2}$  | 2.0705                    | $2.8 \times 10^{-1}$ | 1.8043                    | $9.9 \times 10^{-1}$ | 1.5173                    | $2.0 \times 10^{-1}$ |
| $\alpha_{0,3}$ | $1.5538 \times 10^{-2}$   | $3.8 \times 10^{-3}$ | $1.1932 \times 10^{-2}$   | $6.0 \times 10^{-3}$ | $6.6033 \times 10^{-3}$   | $1.5 \times 10^{-3}$ |
| $\beta_{0,3}$  | $8.6658 \times 10^{-4}$   | $6.3 \times 10^{-4}$ | $1.5240 \times 10^{-3}$   | $3.8 \times 10^{-4}$ | $1.654 \times 10^{-3}$    | $6.7 \times 10^{-4}$ |
| $z_{\alpha,3}$ | $1.3479 \times 10^{-5}$   | $1.0 \times 10^{-5}$ | $1.4769 \times 10^{-5}$   | $6.1 \times 10^{-6}$ | $2.965 \times 10^{-5}$    | $1.2 \times 10^{-5}$ |
| $z_{\beta,3}$  | $1.6309 \times 10^{-7}$   | $1.1 \times 10^{-7}$ | $5.1742 \times 10^{-7}$   | $2.2 \times 10^{-7}$ | $2.7365 \times 10^{-7}$   | $1.2 \times 10^{-7}$ |

Table S1.- Fitted average parameters for forward and backward transitions. Values for  $\alpha_{0,1}$  and  $\beta_{0,1}$  are in  $\text{ms}^{-1}$ . Values for  $z$  are in  $e^-$ .

Figure S1

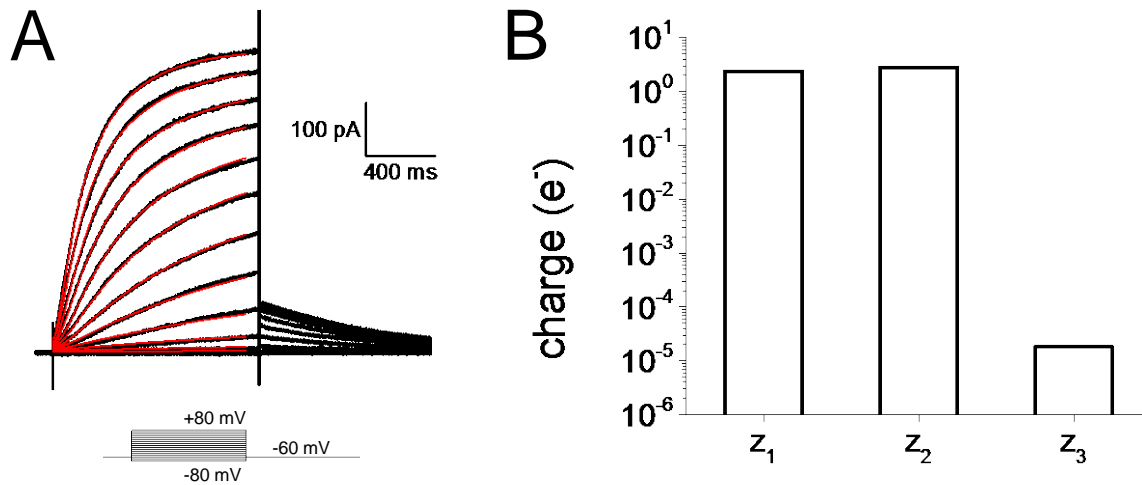

Figure S1- Simultaneous fitting of activating currents to a multi-state model. (A) A four-state sequential model was used to fit the activation kinetics of Hv1, where the first 3 states of the model are non-conductive (closed,  $C_1$ - $C_3$ ). All forward ( $\alpha_i$ ) and backward ( $\beta_i$ ) transition rates are considered essentially voltage-sensitive (Eqs. 1 and 2 in Materials and Methods). (B) Simultaneous fitting of currents traces recorded at potentials ranging from -40 to +80 mV at  $\text{pH}_i$  4.5 and  $\text{pH}_o$  6.5. Traces between -80 and -50 were not included in the fitting process. (C) There were two parameters for each transition rate, one is the rate at 0 mV ( $\alpha_0$  or  $\beta_0$ , accordingly) and the other is the apparent charge associated with the rate ( $z_{\alpha 0}$  and  $z_{\beta 0}$ , accordingly). The total charge of the transitions between two states was obtained by the sum of the individuals charges. As shown in the graph, the gating charge associated with the first and second transitions,  $z_1$  and  $z_2$ , respectively, displayed values of  $\sim 2.5 e^-$  each, while the last transition showed about  $2 \times 10^{-5} e^-$ .

Figure S2

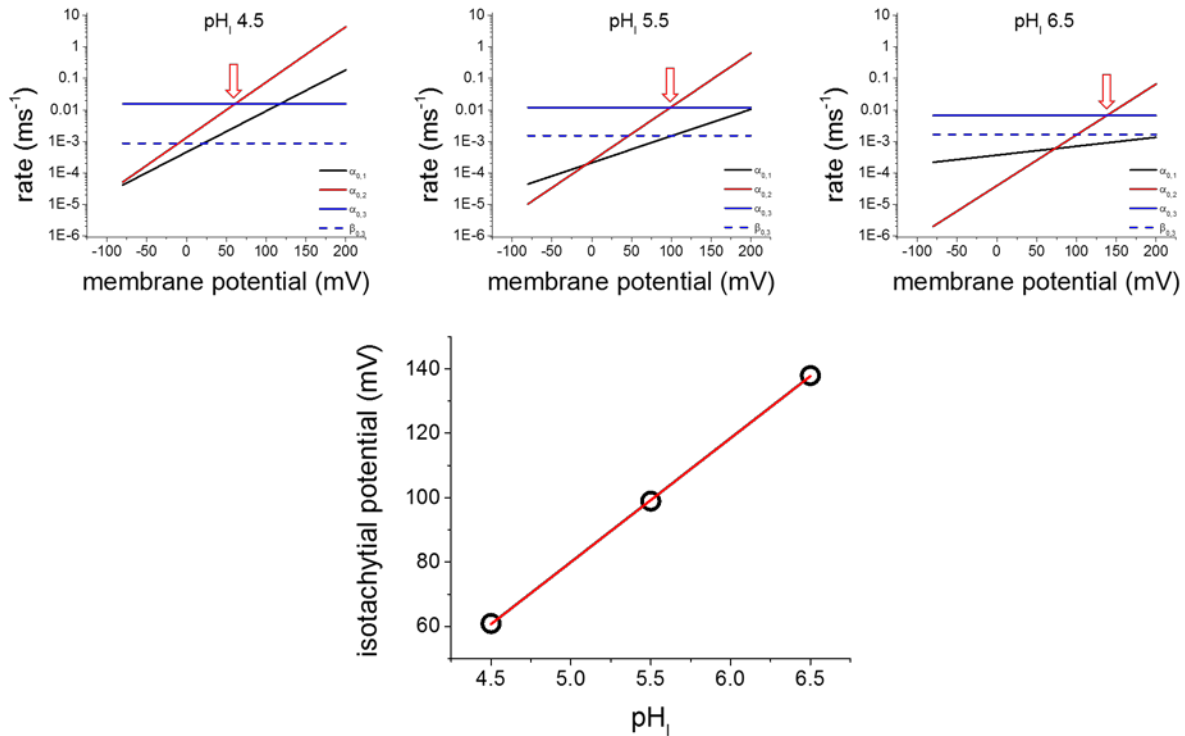

Figure S2.- *Top*) Calculated values of  $\alpha_1$  (black),  $\alpha_2$  (red) and  $\alpha_3$  (blue) as a function of the membrane potential at pH<sub>I</sub> 4.5 (left), 5.5 (center) and 6.5 (right). *Bottom*) Plot of the membrane potential at which  $\alpha_2$  equals  $\alpha_3$  as a function of pH<sub>I</sub>. At voltages above these potentials, or isotachytal potentials ( $V_{IT}$ ; from the Greek words ίσος (isos) = equal and ταχύτητα (tachýtita) = speed), the last transition can be considered to be rate-limiting. Noteworthy, a linear fit of  $V_{IT}$  versus pH<sub>I</sub> plot yielded a slope of  $38.5 \pm 0.3$  mV/ $\Delta$ pH<sub>I</sub>, which matches the pH<sub>I</sub> sensitive of the overall voltage-dependence of Hv1. The  $V_{IT}$  was

$$\text{calculated using the equation } V_{IT} = \frac{kT \ln(\alpha_{0,2}/\alpha_{0,3})}{z_{\alpha,3} - z_{\alpha,2}}.$$
